# Supplementary material for: Freeze‐dried noncoagulating platelet‐derived factor concentrate is a safe and effective treatment for early knee osteoarthritis
Source: Springer Nature journal article supplement (doi:10.1007/s00167-023-07414-y), 2023-06-28

Supplementary Figure 1. KOOS Score change by grade of Knee Osteoarthritis. (Pain)

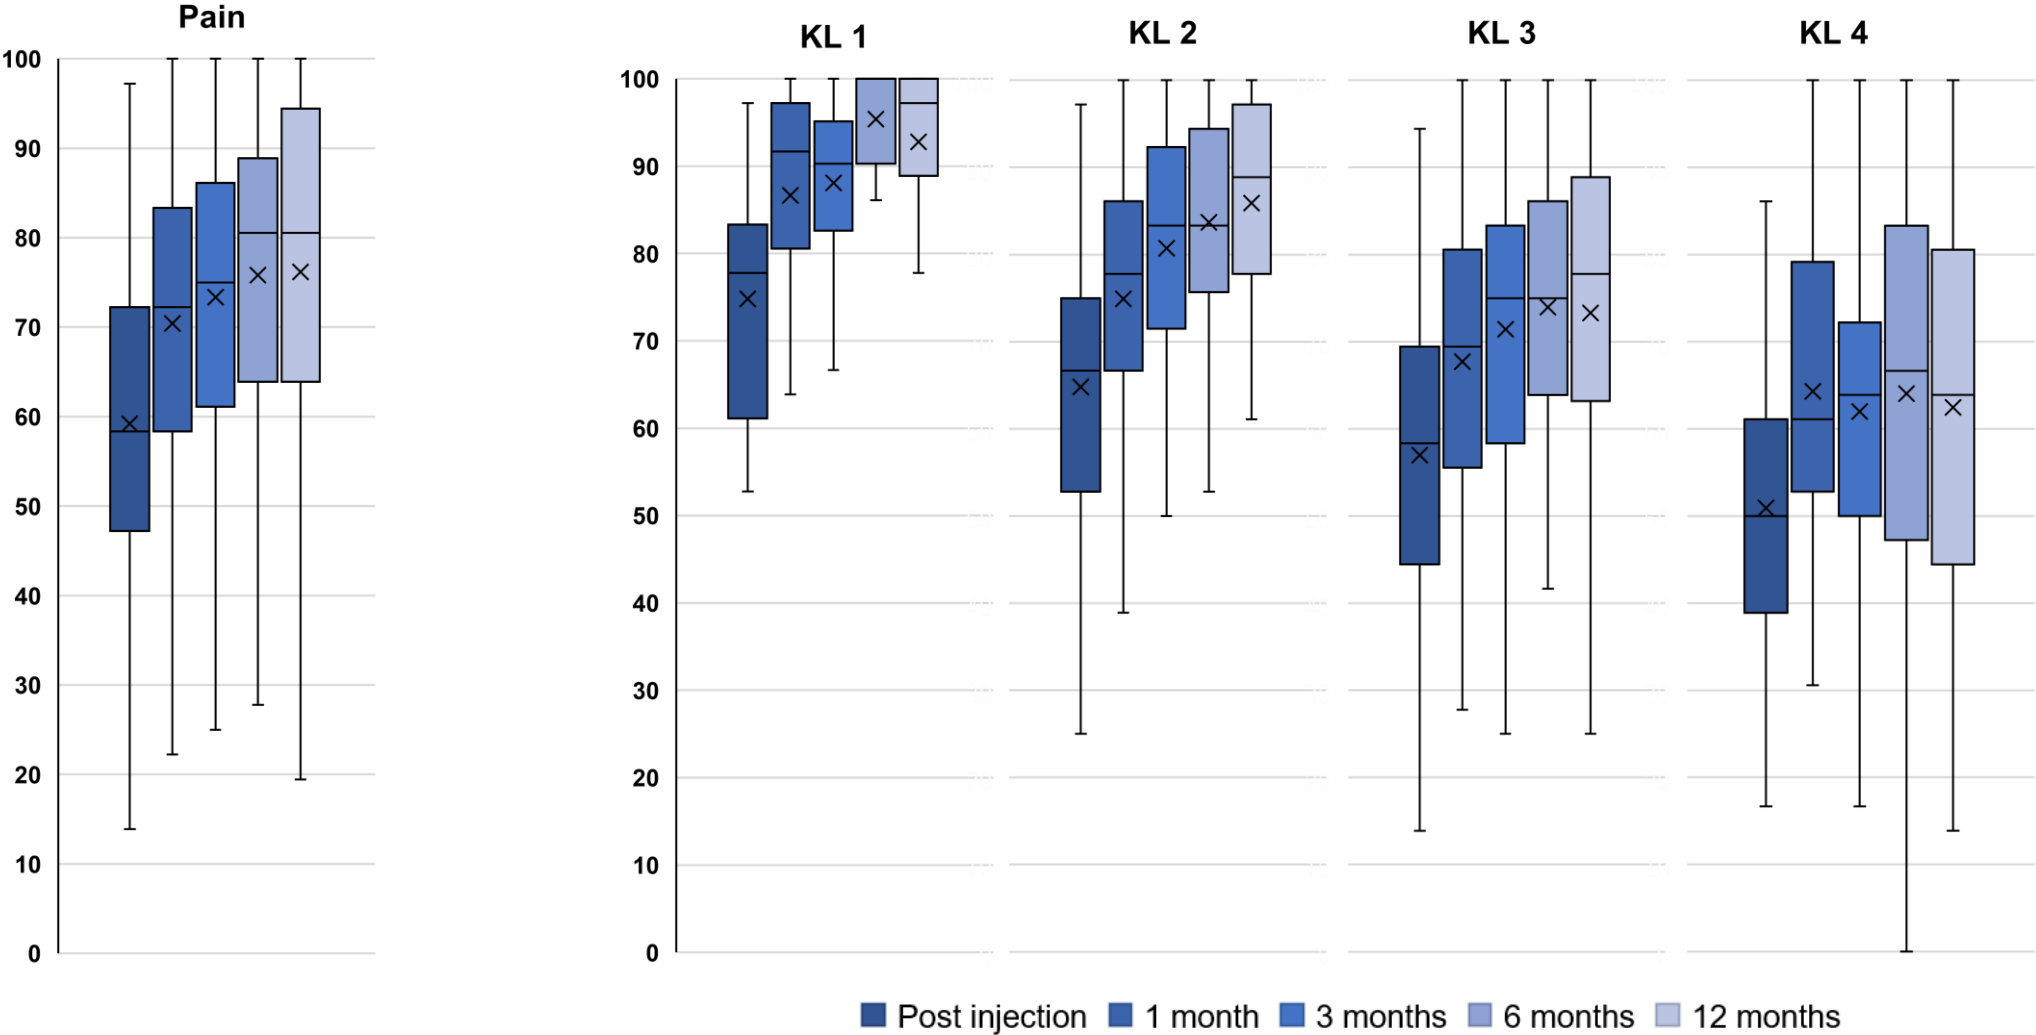

Supplement: MOESM1 [file 167_2023_7414_MOESM1_ESM.pdf]
